# Supplementary material for: A versatile mono-quaternary ammonium salt as a mesoporogen for the synthesis of hierarchical zeolites
Source: Royal Society of Chemistry journal article supplement (doi:10.1039/c9cy02001b), 2019-01-01
Supplement: c9cy02001b1.pdf [file c9cy02001b1.pdf]

## Supporting information for

### **A versatile mono-quaternary ammonium salt as mesoporegen for the synthesis of hierarchical zeolites**

Aleksei Bolshakov, Arno J.F. van Hoof, Brahim Mezari, Nikolay Kosinov and Emiel J.M. Hensen\*

Laboratory of Inorganic Materials and Catalysis, Schuit Institute of Catalysis, Department of Chemical Engineering and Chemistry, Eindhoven University of Technology, P.O. Box 513, 5600 MB Eindhoven, The Netherlands

Corresponding author:

Emiel J.M. Hensen

Tel: +31-40-2475178

Email: [e.j.m.hensen@tue.nl](mailto:e.j.m.hensen@tue.nl)

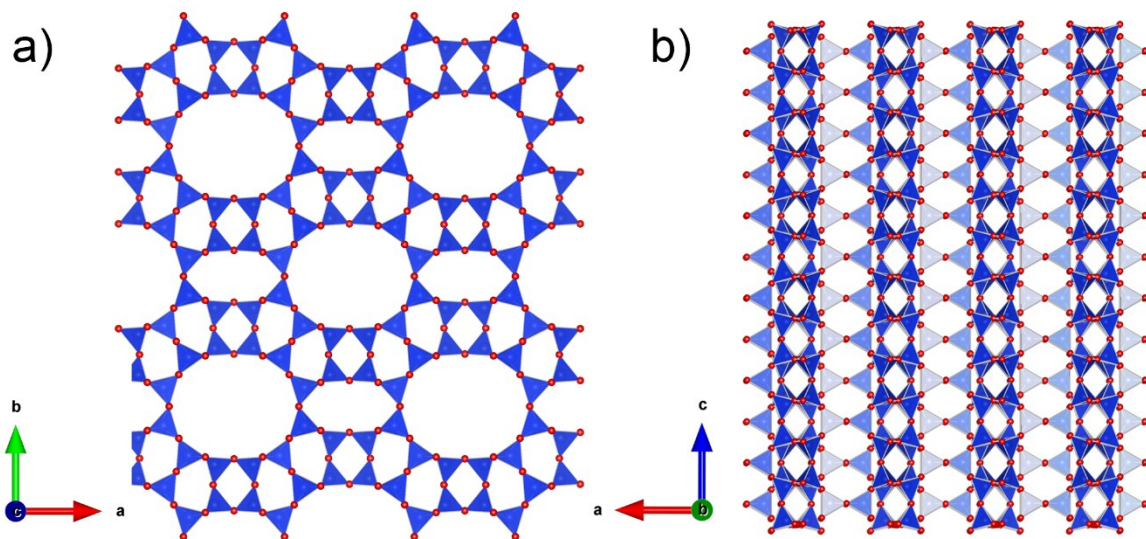

**Figure S1.** MOR structure and its a) 12 membered ring and b) 8 membered ring side pockets.

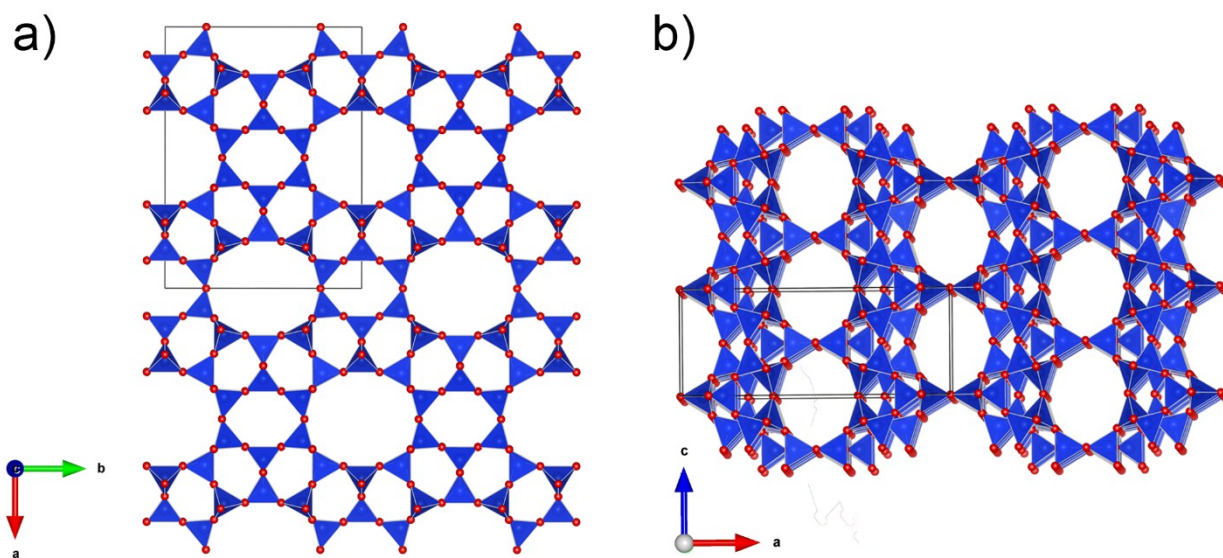

**Figure S2.** FER structure and its a) 10 membered ring and b) 8 membered ring channels.

**Table S1.** Textural properties of FER samples synthesized at different SDA concentration.

| Zeolite  | $V_{\text{tot}}$<br>( $\text{cm}^3 \text{g}^{-1}$ ) | $V_{\text{micro}}$<br>( $\text{cm}^3 \text{g}^{-1}$ ) | $V_{\text{meso}}$<br>( $\text{cm}^3 \text{g}^{-1}$ ) | $S_{\text{BET}}$<br>( $\text{m}^2 \text{g}^{-1}$ ) | $S_{\text{ext}}$<br>( $\text{m}^2 \text{g}^{-1}$ ) |
|----------|-----------------------------------------------------|-------------------------------------------------------|------------------------------------------------------|----------------------------------------------------|----------------------------------------------------|
| FER-C    | 0.16                                                | 0.11                                                  | 0.05                                                 | 343.1                                              | 38.3                                               |
| FER-0.10 | 0.30                                                | 0.09                                                  | 0.21                                                 | 341.2                                              | 130.2                                              |
| FER-0.15 | 0.33                                                | 0.08                                                  | 0.25                                                 | 316.3                                              | 153.8                                              |

$V_{\text{tot}}$  total pore volume at  $p/p_0 = 0.95$

$V_{\text{micro}}$  micropore volume calculated by the *t*-plot method

$V_{\text{meso}}$  mesopore volume calculated by the *BJH* method

$S_{\text{BET}}$  Brunauer-Emmett-Teller (BET) surface area ( $p/p_0 = 0.05-0.25$ )

$S_{\text{ext}}$  external surface area determined by the *t*-plot method.

**Table S2.** Properties of synthesized samples determined by ICP-OES analysis and  $^{27}\text{Al}$  MAS NMR.

| Zeolite  | Si/Al<br>(ICP) | Al distribution* (%)   |                       |
|----------|----------------|------------------------|-----------------------|
|          |                | tetra Al <sup>IV</sup> | octa Al <sup>VI</sup> |
| FER-C    | 9.9            | 78.7                   | 21.3                  |
| FER-0.10 | 9.4            | 72.1                   | 27.9                  |
| FER-0.15 | 10.5           | 71.6                   | 28.4                  |

\* Al tetra determined by integration of NMR signal between 20 and 100 ppm; Al-octa determined by integration of NMR signal between 20 and -50 ppm.

**Table S3.** Acidic properties of the zeolites determined by IR spectroscopy of adsorbed pyridine and  $\text{H}_2$  chemisorption.

| Zeolite  | BAS ( $\text{mmol g}^{-1}$ ) |        |        | LAS ( $\text{mmol g}^{-1}$ ) |        |        |
|----------|------------------------------|--------|--------|------------------------------|--------|--------|
|          | 150 °C                       | 300 °C | 500 °C | 150 °C                       | 300 °C | 500 °C |
| FER-C    | 0.45                         | 0.45   | 0.33   | 0.06                         | 0.06   | 0.09   |
| FER-0.10 | 0.36                         | 0.32   | 0.20   | 0.07                         | 0.06   | 0.08   |
| FER-0.15 | 0.31                         | 0.26   | 0.16   | 0.07                         | 0.06   | 0.07   |

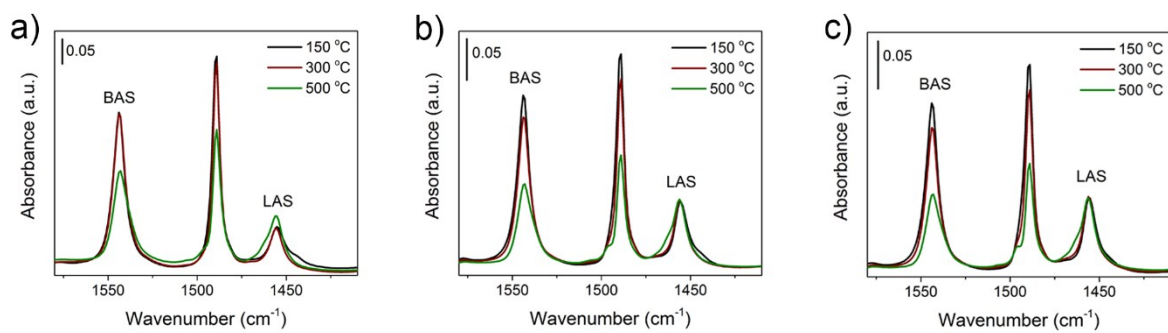

**Figure S3.** Infrared spectra of pyridine adsorbed on the proton forms of a) FER-C, b) FER-0.10 and c) FER-0.15 sample after evacuation at 150 °C, 300 °C and 500 °C, IR spectra were recorded at 150 °C.

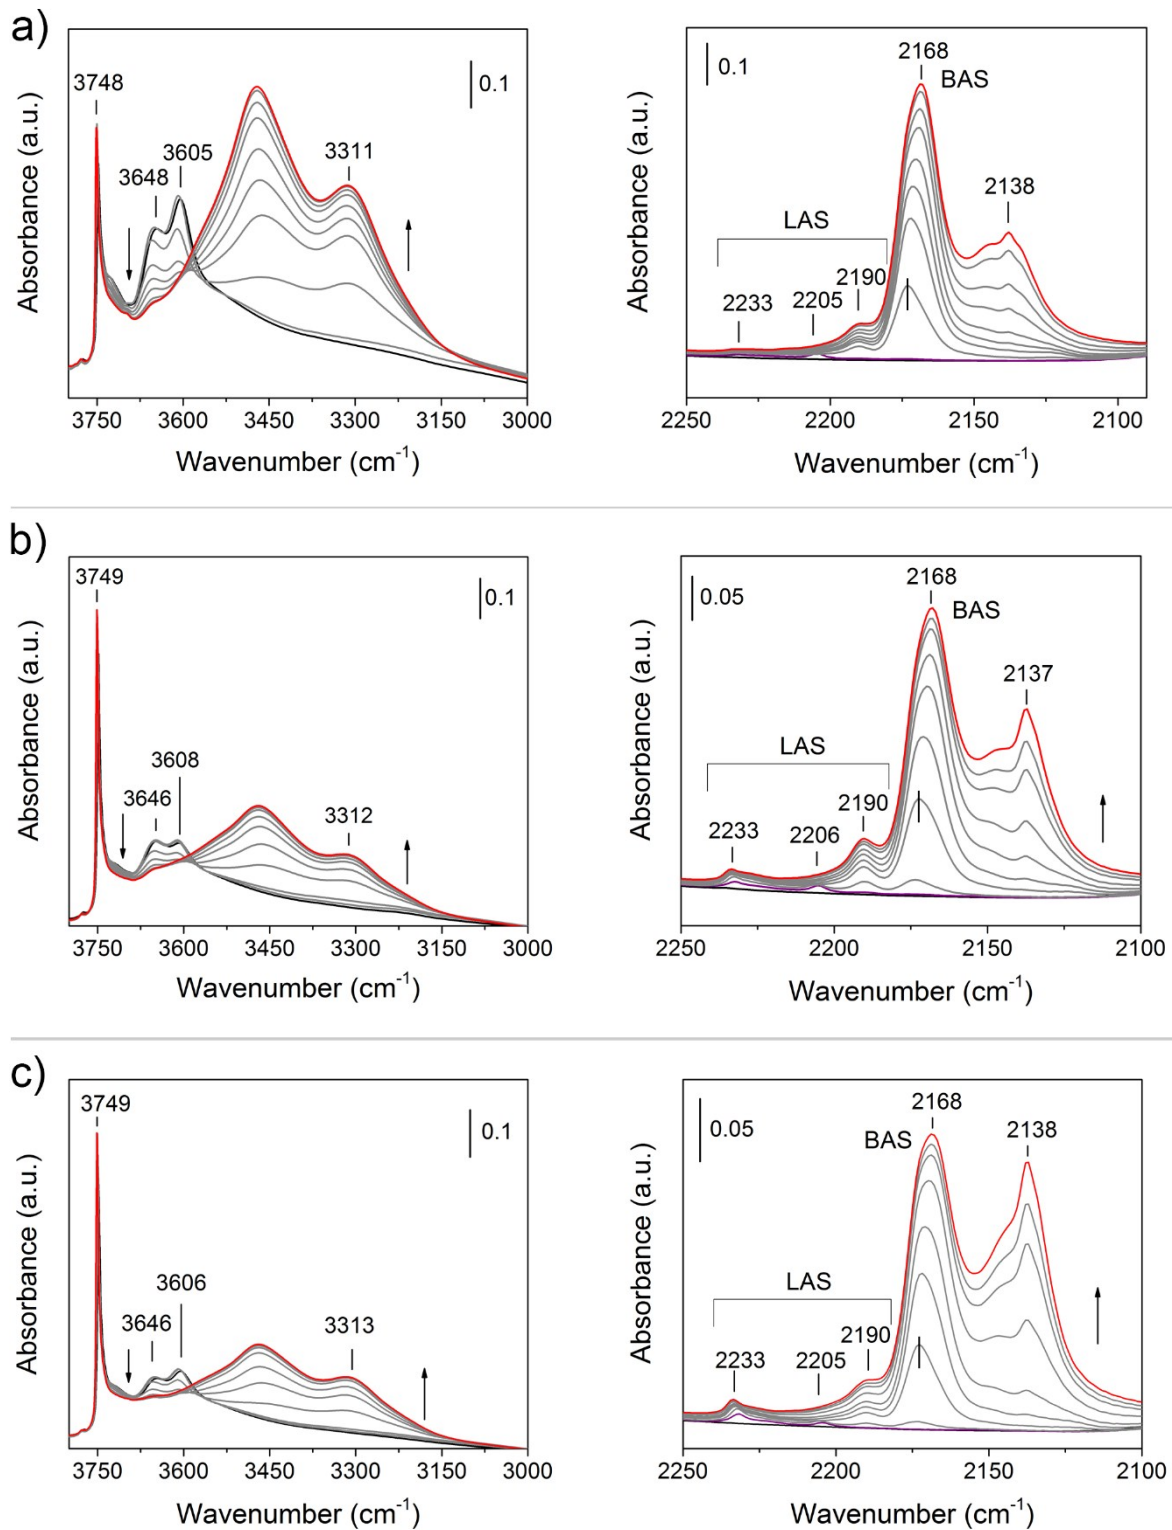

**Figure S4.** (Left) hydroxyl and (right) CO stretch regions of FTIR spectra of a) FER-C, b) FER-0.10 and c) FER-0.15 as a function of the CO coverage.

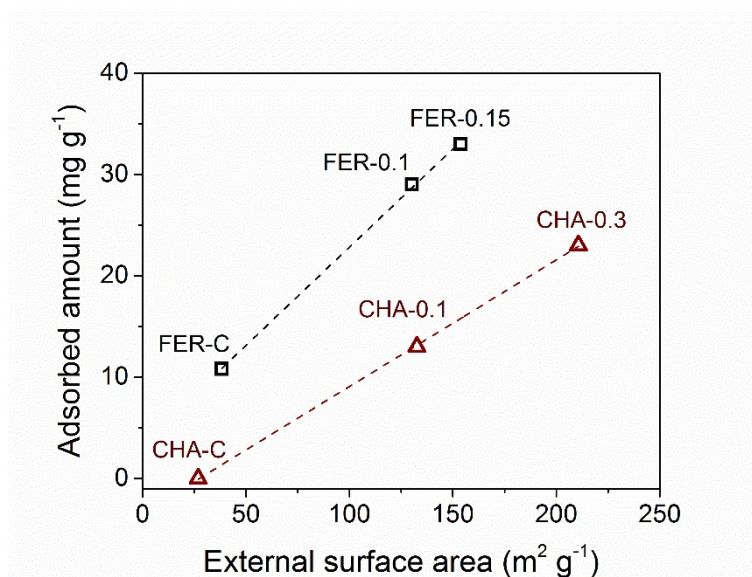

**Figure S5.** Correlation between the external surface area of FER (black) and CHA (red) samples and initial uptake of benzene after 2 minutes of He/benzene exposure.

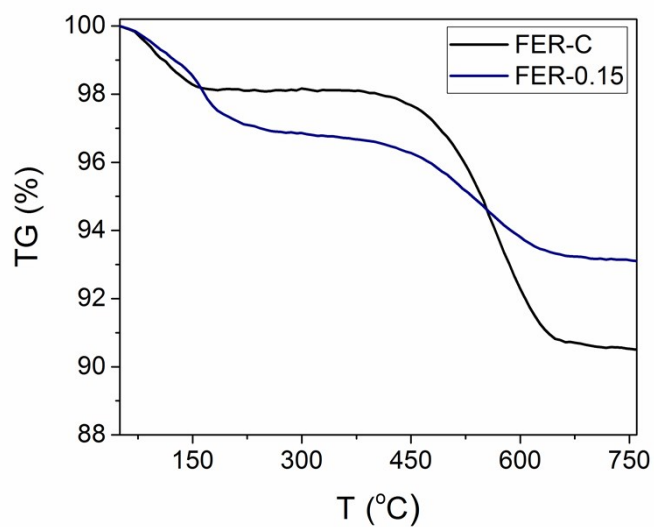

**Figure S6.** Thermogravimetric analysis (TGA) of the spent FER catalysts after 108 h of Butanol conversion. The weight losses for FER-C and FER-0.15 are 9.5 % and 6.9 %, respectively.



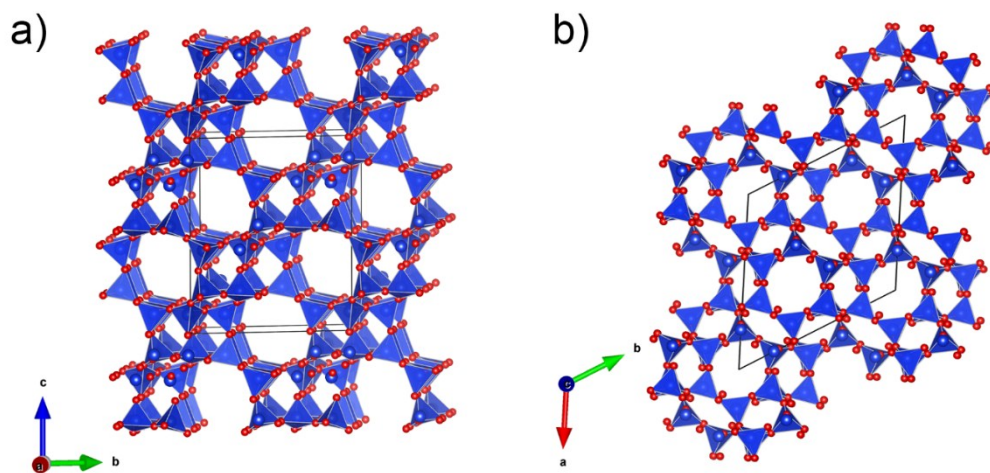

**Figure S7.** CHA structure a) viewed along  $a$ -axis and b) its projection along  $[001]$ .

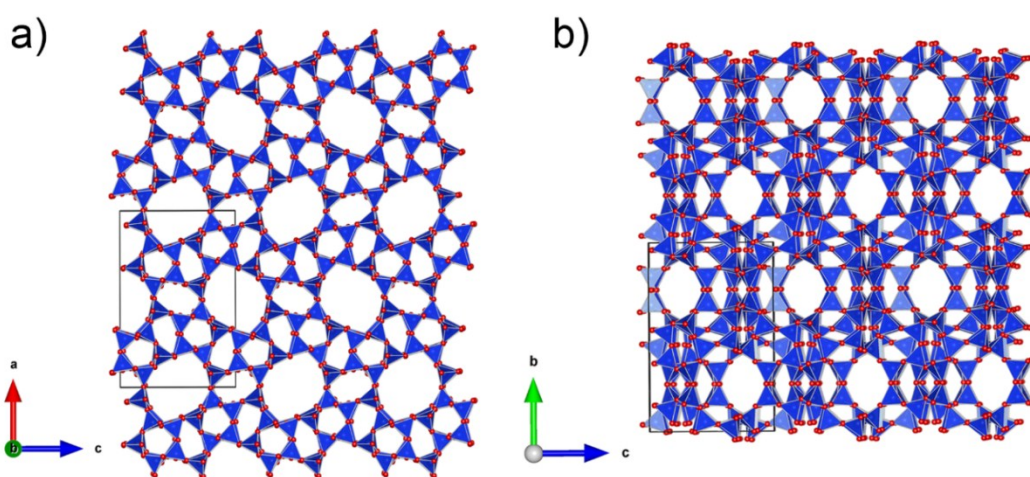

**Figure S8.** MFI structure a) viewed along  $b$ -axis and b) its projection along  $[100]$ .

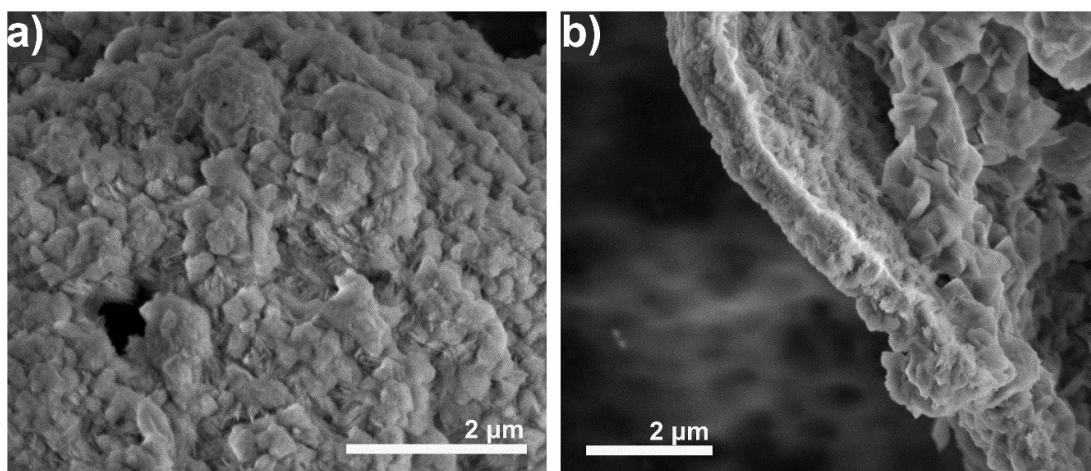

**Figure S9.** SEM images of calcined MFI zeolites: a) MFI-0.3 and b) MFI-0.4.

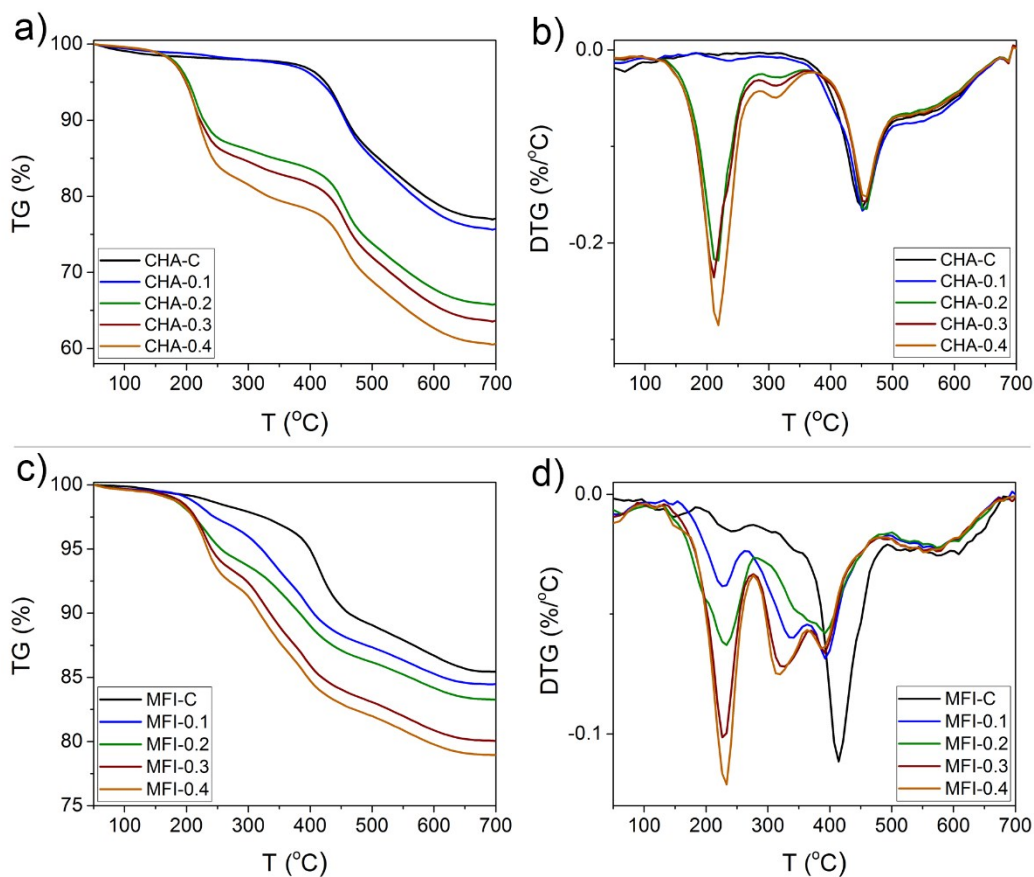

**Figure S10.** a,c) Thermogravimetric analysis (TGA) and b,d) derivative thermogravimetry (DTG) of the as-synthesized CHA (a,b) and MFI (c,d) samples obtained at different concentration of C<sub>16</sub>NMP. The weight losses for CHA-C, CHA-0.1, CHA-0.2, CHA-0.3 and CHA-0.4 are 22.9 %, 24.2 %, 34.1 %, 36.3 % and 39.3 %, respectively. The weight losses for MFI-C, MFI-0.1, MFI-0.2, MFI-0.3 and MFI-0.4 are 14.6 %, 15.5 %, 16.7 %, 19.9 % and 21.0 %, respectively.

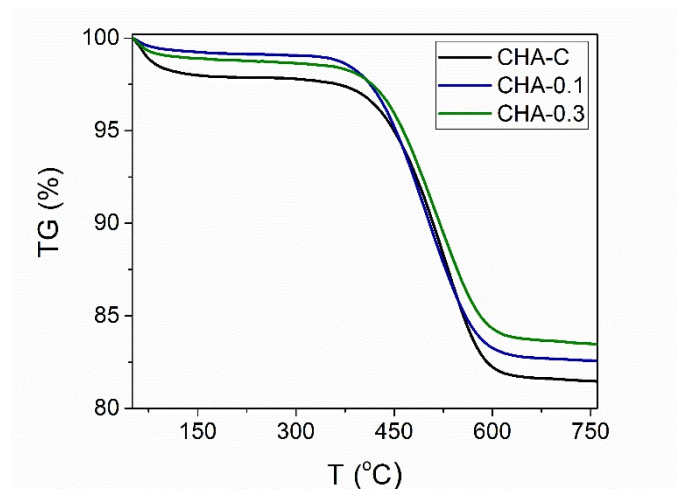

**Figure S11.** Thermogravimetric analysis (TGA) of the spent CHA catalysts after 16.8 h of methanol conversion. The weight losses for CHA-C, CHA-0.1 and CHA-0.3 are 18.6 %, 17.4 % and 16.5 %, respectively.



**Table S4.** Textural properties of CHA and MFI samples synthesized at different SDA concentration.

| Zeolite | $V_{\text{tot}}$<br>( $\text{cm}^3 \text{g}^{-1}$ ) | $V_{\text{micro}}$<br>( $\text{cm}^3 \text{g}^{-1}$ ) | $V_{\text{meso}}$<br>( $\text{cm}^3 \text{g}^{-1}$ ) | $S_{\text{BET}}$<br>( $\text{m}^2 \text{g}^{-1}$ ) | $S_{\text{ext}}$<br>( $\text{m}^2 \text{g}^{-1}$ ) |
|---------|-----------------------------------------------------|-------------------------------------------------------|------------------------------------------------------|----------------------------------------------------|----------------------------------------------------|
| CHA-C   | 0.28                                                | 0.25                                                  | 0.03                                                 | 736.6                                              | 26.9                                               |
| CHA-0.1 | 0.31                                                | 0.19                                                  | 0.11                                                 | 672.3                                              | 132.6                                              |
| CHA-0.2 | 0.33                                                | 0.19                                                  | 0.13                                                 | 689.5                                              | 166.9                                              |
| CHA-0.3 | 0.36                                                | 0.18                                                  | 0.17                                                 | 668.1                                              | 210.7                                              |
| CHA-0.4 | 0.43                                                | 0.18                                                  | 0.24                                                 | 682.1                                              | 180.4                                              |
| CHA-0.5 | 0.44                                                | 0.18                                                  | 0.24                                                 | 679.6                                              | 162.4                                              |
|         |                                                     |                                                       |                                                      |                                                    |                                                    |
| MFI-C   | 0.18                                                | 0.16                                                  | 0.02                                                 | 317.1                                              | 6.6                                                |
| MFI-0.1 | 0.25                                                | 0.13                                                  | 0.13                                                 | 315.8                                              | 61.0                                               |
| MFI-0.2 | 0.28                                                | 0.12                                                  | 0.17                                                 | 317.4                                              | 104.5                                              |
| MFI-0.3 | 0.25                                                | 0.10                                                  | 0.15                                                 | 316.4                                              | 118.2                                              |

$V_{\text{tot}}$  total pore volume at  $p/p_0 = 0.95$

$V_{\text{micro}}$  micropore volume calculated by the *t*-plot method

$V_{\text{meso}}$  mesopore volume calculated by the *BJH* method

$S_{\text{BET}}$  Brunauer-Emmett-Teller (BET) surface area ( $p/p_0 = 0.05-0.25$ )

$S_{\text{ext}}$  external surface area determined by the *t*-plot method.

**Table S5.** Physico-chemical properties of CHA and MFI zeolites determined by ICP-OES elemental analysis and  $^{27}\text{Al}$ -,  $^1\text{H}$  MAS NMR spectroscopy.

| Zeolite | Si/Al<br>(ICP) | Al distribution <sup>a</sup> (%) |                       | BAS <sup>b</sup><br>(mmol g <sup>-1</sup> ) |
|---------|----------------|----------------------------------|-----------------------|---------------------------------------------|
|         |                | tetra Al <sup>IV</sup>           | octa Al <sup>VI</sup> |                                             |
| CHA-C   | 18.7           | 88.3                             | 11.7                  | 0.70                                        |
| CHA-0.1 | 19.8           | 81.4                             | 18.6                  | 0.40                                        |
| CHA-0.3 | 21.2           | 86.8                             | 13.2                  | 0.61                                        |
| CHA-0.4 | 23.2           | 83.8                             | 16.2                  | -                                           |
| MFI-C   | 38.6           | 90.2                             | 9.8                   | 0.37                                        |
| MFI-0.1 | 40.7           | 86.8                             | 13.2                  | 0.30                                        |
| MFI-0.2 | 40.9           | 89.3                             | 10.7                  | 0.27                                        |

<sup>a</sup> Al tetra determined by integration of NMR signal between 20 and 100 ppm; Al-octa determined by integration of NMR signal between 20 and -50 ppm

<sup>b</sup> density of Brønsted acid sites calculated from  $^1\text{H}$  MAS NMR spectra.

**Table S6.** Lifetime, product selectivity of MTH reaction after 2 h time on stream over CHA samples.

| Zeolite | $t_{50}$ <sup>a</sup> (h) | Selectivity (%) |                             |                |                             |                                |
|---------|---------------------------|-----------------|-----------------------------|----------------|-----------------------------|--------------------------------|
|         |                           | C <sub>2</sub>  | C <sub>2</sub> <sup>=</sup> | C <sub>3</sub> | C <sub>3</sub> <sup>=</sup> | C <sub>4</sub> -C <sub>6</sub> |
| CHA-C   | 5.2                       | 1.0             | 42.4                        | 1.9            | 37.6                        | 17.1                           |
| CHA-0.1 | 12.0                      | 0.9             | 43.1                        | 0.4            | 39.4                        | 16.2                           |
| CHA-0.3 | 14.0                      | 1.0             | 43.7                        | 0.3            | 39.0                        | 16.0                           |

<sup>a</sup> lifetime taken as time to reach methanol conversion of 50 %.

**Table S7.** Lifetime, product selectivity of MTH reaction after 2 h time on stream over MFI samples.

| Zeolite | $t_{50}$ <sup>a</sup> (h) | Selectivity (%) |                             |                |                             |                 |           |
|---------|---------------------------|-----------------|-----------------------------|----------------|-----------------------------|-----------------|-----------|
|         |                           | C <sub>2</sub>  | C <sub>2</sub> <sup>=</sup> | C <sub>3</sub> | C <sub>3</sub> <sup>=</sup> | C <sub>4+</sub> | Aromatics |
| MFI-C   | 26.0                      | 0.2             | 8.6                         | 1.8            | 35.9                        | 50.3            | 3.2       |
| MFI-0.1 | 75.9                      | 0.2             | 7.6                         | 1.7            | 33.5                        | 52.7            | 4.3       |
| MFI-0.2 | 63.7                      | 0.2             | 7.8                         | 2.2            | 31.4                        | 53.9            | 4.5       |

<sup>a</sup> lifetime taken as time to reach methanol conversion of 50 %.
